# Supplementary material
Source: PubMed Central journal article supplement (PMC6260976)
Supplement: NIHMS995664-supplement-SI.pdf [file NIHMS995664-supplement-SI.pdf]

**Supporting Information**

**NMR-Guided Mass Spectrometry for Absolute Quantitation  
of Human Blood Metabolites**

G. A. Nagana Gowda,<sup>1\*</sup> Danijel Djukovic,<sup>1</sup> Lisa Fan Bettcher,<sup>1</sup> Haiwei Gu,<sup>1</sup> and Daniel  
Raftery<sup>1,2,3\*</sup>

<sup>1</sup>*Northwest Metabolomics Research Center, Anesthesiology and Pain Medicine, and*

<sup>2</sup>*Department of Chemistry, University of Washington, Seattle, WA 98109,*

<sup>3</sup>*Fred Hutchinson Cancer Research Center, Seattle, WA 98109*

\*Address correspondence to

G. A. Nagana Gowda ([ngowda@uw.edu](mailto:ngowda@uw.edu)); ORCID: 0000-0002-0544-7464

Daniel Raftery ([draftery@uw.edu](mailto:draftery@uw.edu)); ORCID: 0000-0003-2467-8118

This file contains 12 pages, S1 to S12. The first page is the Title page; pages S2 to S5 contain Table S1, Table S2, Table S3 and Table S4, respectively; pages S6 to S8 contain Figure S1 and pages S9 to S12 contain Figures S2 to S5, respectively.

| <b>Table S1:</b> Demographical parameters for the serum samples used for absolute quantitation of metabolites by mass spectrometry |                  |        |             |
|------------------------------------------------------------------------------------------------------------------------------------|------------------|--------|-------------|
| Serum sample                                                                                                                       | Race             | Gender | Age (Years) |
| Serum 1                                                                                                                            | Caucasian        | Female | 45          |
| Serum 2                                                                                                                            | African American | Female | 41          |
| Serum 3                                                                                                                            | Caucasian        | Male   | 28          |
| Serum 4                                                                                                                            | Caucasian        | Female | 26          |
| Serum 5                                                                                                                            | African American | Male   | 30          |
| Serum 6                                                                                                                            | Caucasian        | Male   | 36          |
| Serum 7                                                                                                                            | Caucasian        | Male   | 31          |
| Serum 8                                                                                                                            | Caucasian        | Female | 21          |

**Table S2:** List of common metabolites detected by NMR and MS in the serum samples. Eight metabolites, highlighted in bold, were either overlapped in NMR spectrum, exhibited multiple MRM transitions for the same metabolite, or displayed poor chromatographic peak shapes and hence were omitted from further analysis.

|    | <b>NMR</b>                          | <b>MS (Q1/Q3)</b>                                |
|----|-------------------------------------|--------------------------------------------------|
| 1  | Glycine                             | Glycine (76.0 / 30.2)                            |
| 2  | Sarcosine                           | Sarcosine (89.9 / 44.0)                          |
| 3  | Alanine                             | Alanine (90.0 / 44.0)                            |
| 4  | Choline                             | Choline (104.1 / 60.0)                           |
| 5  | Dimethylglycine                     | Dimethylglycine (104.1 / 58.0)                   |
| 6  | Serine                              | Serine (106.0 / 60.0)                            |
| 7  | Creatinine                          | Creatinine (114.1 / 44.0)                        |
| 8  | Proline                             | Proline (116.1 / 70.0)                           |
| 9  | Betaine                             | Betaine (118.0 / 58.0)                           |
| 10 | Valine                              | Valine (118.1 / 72.0)                            |
| 11 | Threonine                           | Threonine (120.1 / 74.0)                         |
| 12 | Pyroglutamic Acid                   | Pyroglutamic Acid (130.0 / 83.4)                 |
| 13 | Creatine                            | Creatine (132.1 / 90.0)                          |
| 14 | Leucine                             | Leucine (132.1 / 86.0)                           |
| 15 | Isoleucine                          | Isoleucine (132.1 / 86.0 )                       |
| 16 | Ornithine                           | Ornithine (133.1 / 70.0)                         |
| 17 | Asparagine                          | Asparagine (133.1 / 74.0)                        |
| 18 | Aspartic Acid                       | Aspartic Acid (134.1 / 74.0)                     |
| 19 | Glutamine                           | Glutamine (147.1 / 84.0)                         |
| 20 | Lysine                              | Lysine (147.1 / 84.0 (2)                         |
| 21 | <b>Glutamic acid</b>                | <b>Glutamic acid (148.1 / 84.0)</b>              |
| 22 | Methionine                          | Methionine (150.1 / 61.0)                        |
| 23 | Histidine                           | Histidine (156.1 / 110.0)                        |
| 24 | Carnitine                           | Carnitine (162.1 / 85.0)                         |
| 25 | Phenylalanine                       | Phenylalanine (166.1 / 120.0)                    |
| 26 | <b>Arginine</b>                     | <b>Arginine (175.1 / 70.0)</b>                   |
| 27 | <b>Mannose</b>                      | <b>Mannose (181.0 / 99.0)</b>                    |
| 28 | Tyrosine                            | Tyrosine (182.1 / 136.0)                         |
| 29 | Acetylcarnitine                     | Acetylcarnitine (204.1 / 85.0)                   |
| 30 | Tryptophan                          | Tryptophan (205.1 / 146.0)                       |
| 31 | Uridine                             | Uridine (245.1 / 113.1)                          |
| 32 | lactate                             | lactate (89.0 / 43.0)                            |
| 33 | Glucose                             | Glucose (179.0 / 89.0)                           |
| 34 | <b>3-Hydroxybutyric acid (3HBA)</b> | <b>Malonic Acid/3HBA (103.0 / 59.0)</b>          |
| 35 | <b>Fumaric Acid</b>                 | <b>Fumaric Acid/Maleic Acid (114.9 / 71.0)</b>   |
| 36 | <b>Hypoxanthine</b>                 | <b>Hypoxanthine (135.0 / 92.0)</b>               |
| 37 | <b>Xanthine</b>                     | <b>Xanthine (151.0 / 108.0)</b>                  |
| 38 | <b>2-Hydroxyisovaleric Acid</b>     | <b>2/3-Hydroxyisovaleric Acid (117.0 / 71.0)</b> |

**Table S3:** NMR derived metabolites concentrations ( $\mu\text{M}$ ) for the 8 blood serum samples using a single internal reference, TSP.

| Metabolite        | Serum 1 | Serum 2 | Serum 3 | Serum 4 | Serum 5 | Serum 6 | Serum 7 | Serum 8 |
|-------------------|---------|---------|---------|---------|---------|---------|---------|---------|
| Glycine           | 301     | 357     | 308     | 364     | 303     | 252     | 363     | 423     |
| Sarcosine         | 1.4     | 1.2     | 1.5     | 1.7     | 1.2     | 1.2     | 1.4     | 1.7     |
| Alanine           | 372     | 254     | 294     | 248     | 265     | 224     | 286     | 451     |
| Choline           | 15.1    | 15.4    | 15.8    | 14.6    | 13.2    | 25.9    | 18.2    | 19.9    |
| Dimethylglycine   | 2.4     | 2.1     | 3.1     | 2.6     | 2.1     | 2.1     | 2.4     | 2.6     |
| Serine            | 88.8    | 101     | 120     | 127     | 98.7    | 97.0    | 110     | 158     |
| Creatinine        | 59.5    | 54.9    | 65.1    | 50.7    | 66.3    | 60.9    | 60.5    | 55.9    |
| Proline           | 346     | 213     | 360     | 307     | 282     | 192     | 327     | 617     |
| Betaine           | 54.9    | 36.0    | 44.7    | 44.1    | 38.4    | 48.9    | 45.9    | 55.0    |
| Valine            | 148     | 89.8    | 123     | 113     | 112     | 112     | 123     | 166     |
| Threonine         | 134.7   | 142.6   | 187.7   | 191.1   | 209.1   | 110.2   | 144.9   | 192.0   |
| Pyroglutamic acid | 343     | 197     | 402     | 365     | 407     | 129     | 367     | 497     |
| Creatine          | 16.1    | 21.6    | 56.9    | 31.9    | 17.1    | 11.1    | 20.4    | 42.9    |
| Leucine           | 80.2    | 54.5    | 84.5    | 53.3    | 70.5    | 60.2    | 65.5    | 105     |
| Isoleucine        | 47.8    | 27.4    | 47.5    | 31.9    | 40.8    | 26.4    | 34.8    | 60.9    |
| Ornithine         | 41.1    | 26.7    | 53.3    | 32.4    | 49.5    | 51.3    | 46.6    | 49.7    |
| Asparagine        | 49.2    | 46.3    | 78.5    | 50.9    | 60.2    | 57.4    | 66.3    | 91.5    |
| Aspartic Acid     | 20.9    | 32.6    | 19.0    | 13.7    | 19.0    | 22.5    | 14.2    | 22.1    |
| Glutamine         | 256     | 256     | 344     | 302     | 291     | 443     | 285     | 389     |
| Lysine            | 80.4    | 58.1    | 111     | 73.7    | 84.3    | 105     | 77.3    | 159     |
| Methionine        | 22.5    | 19.5    | 31.0    | 19.4    | 20.1    | 20.1    | 21.3    | 41.0    |
| Histidine         | 32.1    | 29.5    | 41.0    | 29.1    | 28.5    | 42.2    | 33.4    | 45.9    |
| Carnitine         | 30.5    | 27.3    | 44.7    | 37.7    | 38.2    | 34.1    | 39.6    | 42.9    |
| Phenylalanine     | 64.5    | 59.1    | 74.4    | 50.7    | 52.5    | 64.1    | 54.3    | 93.1    |
| Tyrosine          | 63.9    | 39.4    | 60.3    | 49.0    | 47.1    | 31.5    | 50.7    | 96.0    |
| Acetylcarnitine   | 1.5     | 1.5     | 2.1     | 2.1     | 1.7     | 2.1     | 1.4     | 1.7     |
| Tryptophan        | 30.3    | 28.5    | 38.2    | 31.4    | 33.6    | 39.1    | 41.3    | 46.8    |
| Uridine           | 2.1     | 3.9     | 6.2     | 5.1     | 3.8     | 6.7     | 3.6     | 3.3     |
| lactate           | 1950    | 1790    | 1460    | 862     | 1840    | 2340    | 1060    | 1780    |
| Glucose           | 3730    | 4180    | 3400    | 3800    | 3270    | 3710    | 3450    | 4340    |

**Table S4:** MS derived concentrations ( $\mu\text{M}$ ) for the 8 blood serum samples using the NMR derived concentrations from Serum 7 as the reference.

| Metabolite        | Serum 1 | Serum 2 | Serum 3 | Serum 4 | Serum 5 | Serum 6 | Serum 7 | Serum 8 |
|-------------------|---------|---------|---------|---------|---------|---------|---------|---------|
| Glycine           | 336     | 349     | 322     | 388     | 297     | 250.    | 363     | 374     |
| Sarcosine         | 1.5     | 1.3     | 1.8     | 1.8     | 1.5     | 1.3     | 1.4     | 1.3     |
| Alanine           | 392     | 277     | 320     | 280.    | 287     | 237     | 286     | 421     |
| Choline           | 15.9    | 14.8    | 14.6    | 14.3    | 12.9    | 19.5    | 18.2    | 18.2    |
| Dimethylglycine   | 2.7     | 2.3     | 3.3     | 3.0     | 2.1     | 2.5     | 2.4     | 2.7     |
| Serine            | 99.2    | 110.    | 127     | 145     | 103     | 110     | 110.    | 172     |
| Creatinine        | 64.0    | 53.1    | 63.8    | 53.1    | 64.3    | 59.5    | 60.5    | 50.6    |
| Proline           | 349     | 211     | 345     | 302     | 287     | 170     | 327     | 571     |
| Betaine           | 56.9    | 38.8    | 46.6    | 47.5    | 40.1    | 43.5    | 45.9    | 53.5    |
| Valine            | 156     | 86.6    | 126     | 123     | 109     | 103     | 123     | 136     |
| Threonine         | 131     | 135     | 159     | 196     | 198     | 104     | 145     | 182     |
| Pyroglutamic acid | 313     | 242     | 404     | 264     | 339     | 325     | 367     | 342     |
| Creatine          | 17.8    | 21.3    | 50.6    | 32.6    | 16.6    | 11.3    | 20.4    | 35.9    |
| Leucine           | 82.8    | 50.0    | 84.9    | 56.5    | 68.4    | 60.4    | 65.5    | 96.5    |
| Isoleucine        | 49.0    | 26.4    | 48.1    | 34.5    | 41.1    | 27.7    | 34.8    | 55.3    |
| Ornithine         | 44.4    | 28.7    | 57.0    | 38.1    | 46.4    | 45.5    | 46.6    | 46.1    |
| Asparagine        | 51.7    | 46.7    | 85.1    | 53.8    | 59.2    | 58.2    | 66.3    | 88.3    |
| Aspartic Acid     | 21.9    | 30.0    | 19.1    | 14.7    | 18.9    | 22.0    | 14.2    | 20.9    |
| Glutamine         | 283     | 238     | 312     | 310.    | 294     | 293     | 285     | 330.    |
| Lysine            | 84.3    | 55.7    | 107     | 80.5    | 78.5    | 83.0    | 77.3    | 122     |
| Methionine        | 22.1    | 17.6    | 30.6    | 21.1    | 18.7    | 17.8    | 21.3    | 34.7    |
| Histidine         | 32.9    | 27.3    | 42.2    | 29.6    | 29.5    | 33.1    | 33.4    | 40.9    |
| Carnitine         | 38.8    | 30.8    | 45.5    | 38.6    | 39.5    | 34.6    | 39.6    | 43.7    |
| Phenylalanine     | 66.9    | 57.3    | 76.4    | 53.1    | 53.3    | 60.0    | 54.3    | 93.6    |
| Tyrosine          | 71.6    | 41.0    | 69.6    | 57.8    | 54.7    | 32.6    | 50.7    | 88.8    |
| Acetylcarnitine   | 1.4     | 1.5     | 1.6     | 1.8     | 1.5     | 1.5     | 1.4     | 1.5     |
| Tryptophan        | 32.1    | 27.9    | 38.8    | 33.6    | 35.6    | 38.0    | 41.3    | 43.5    |
| Uridine           | 2.2     | 4.2     | 5.6     | 5.2     | 3.8     | 6.1     | 3.6     | 3.5     |
| lactate           | 1680    | 1580    | 1460    | 993     | 1690    | 2100    | 1060    | 1430    |
| Glucose           | 3440    | 3630    | 3360    | 3760    | 2960    | 3440    | 3450    | 3540    |

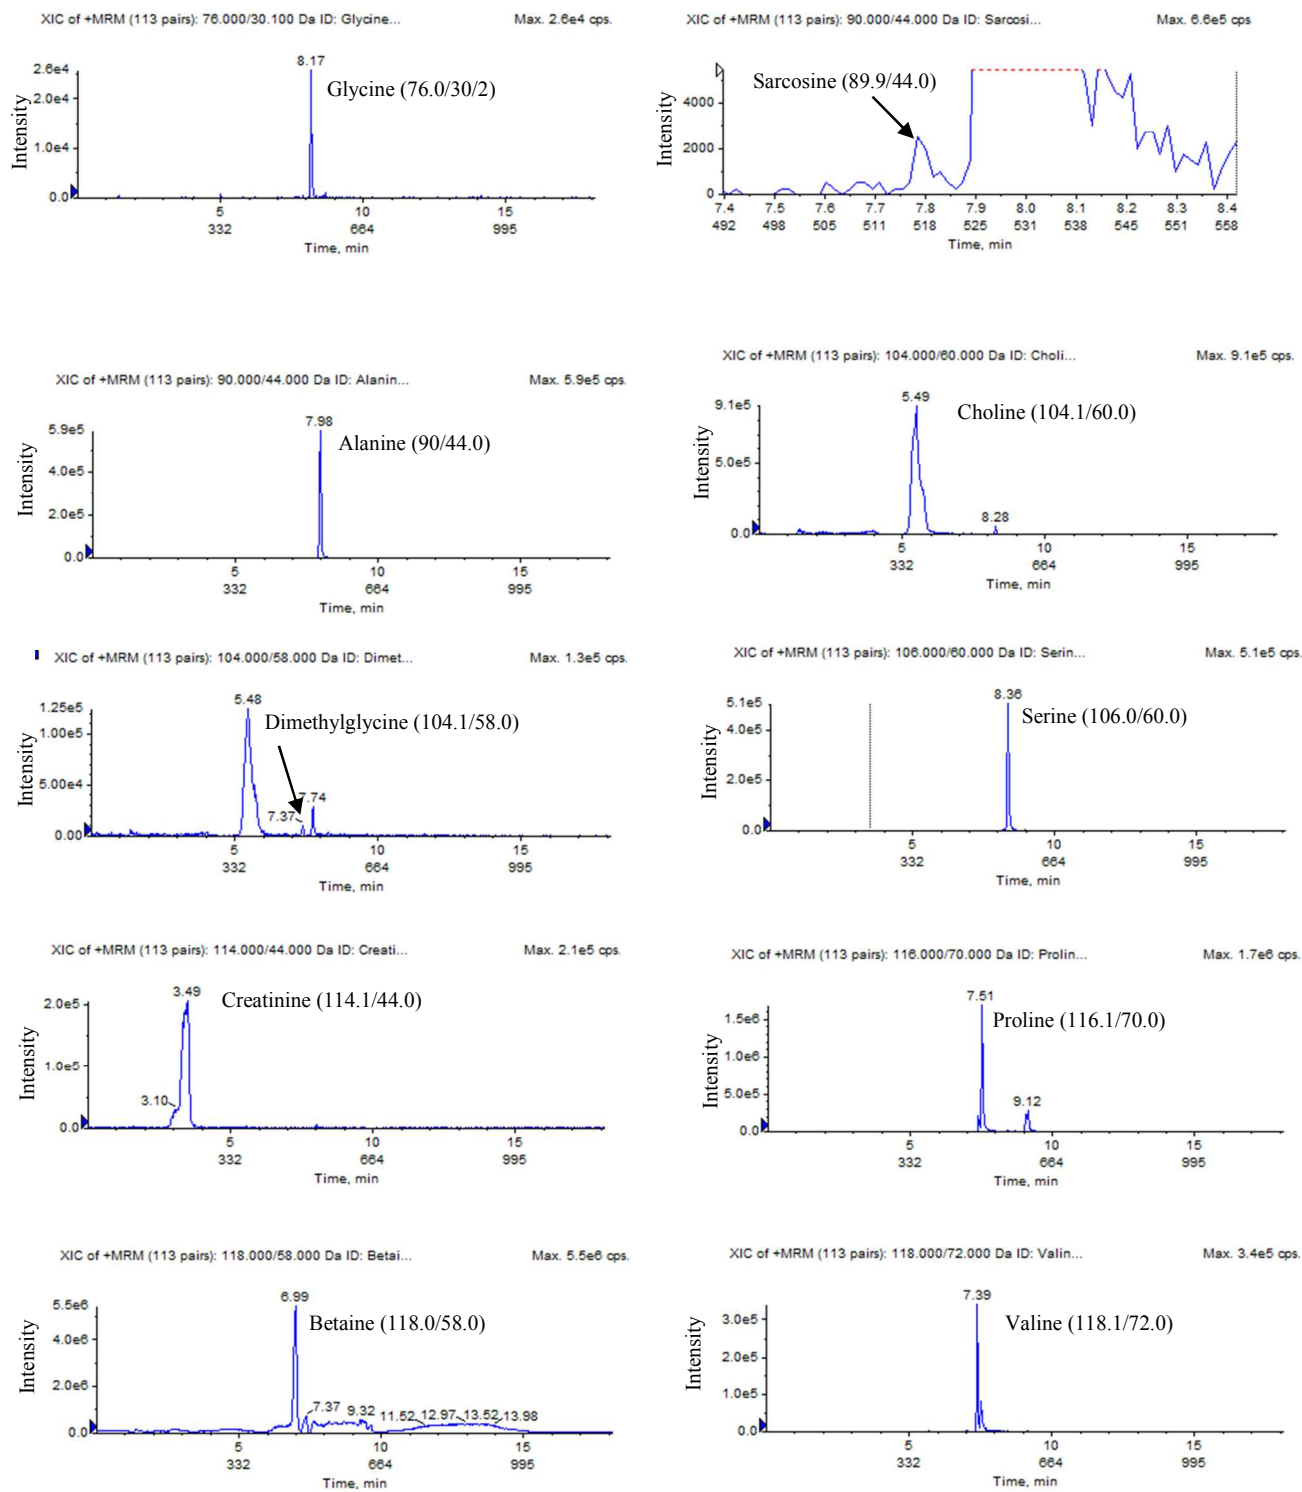

**Figure S1:** Typical MS/MS ion chromatograms for metabolites used for NMR-guided absolute quantitation in MS.

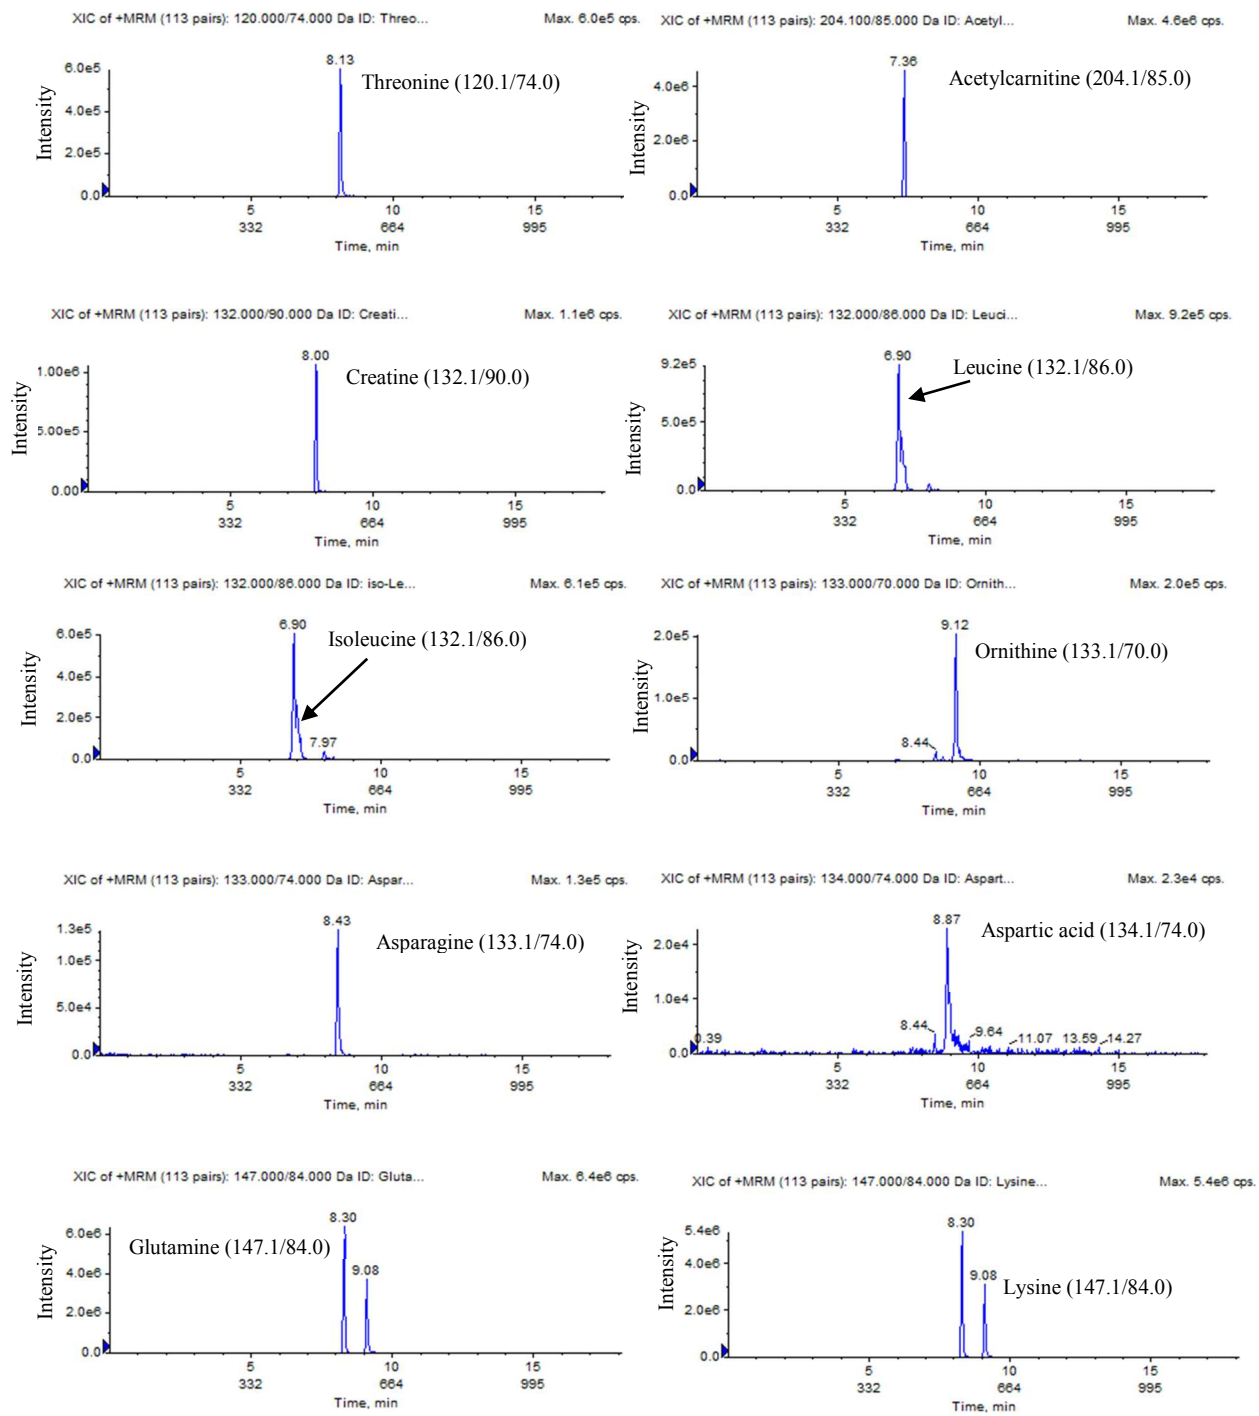

Figure S1: Continued.

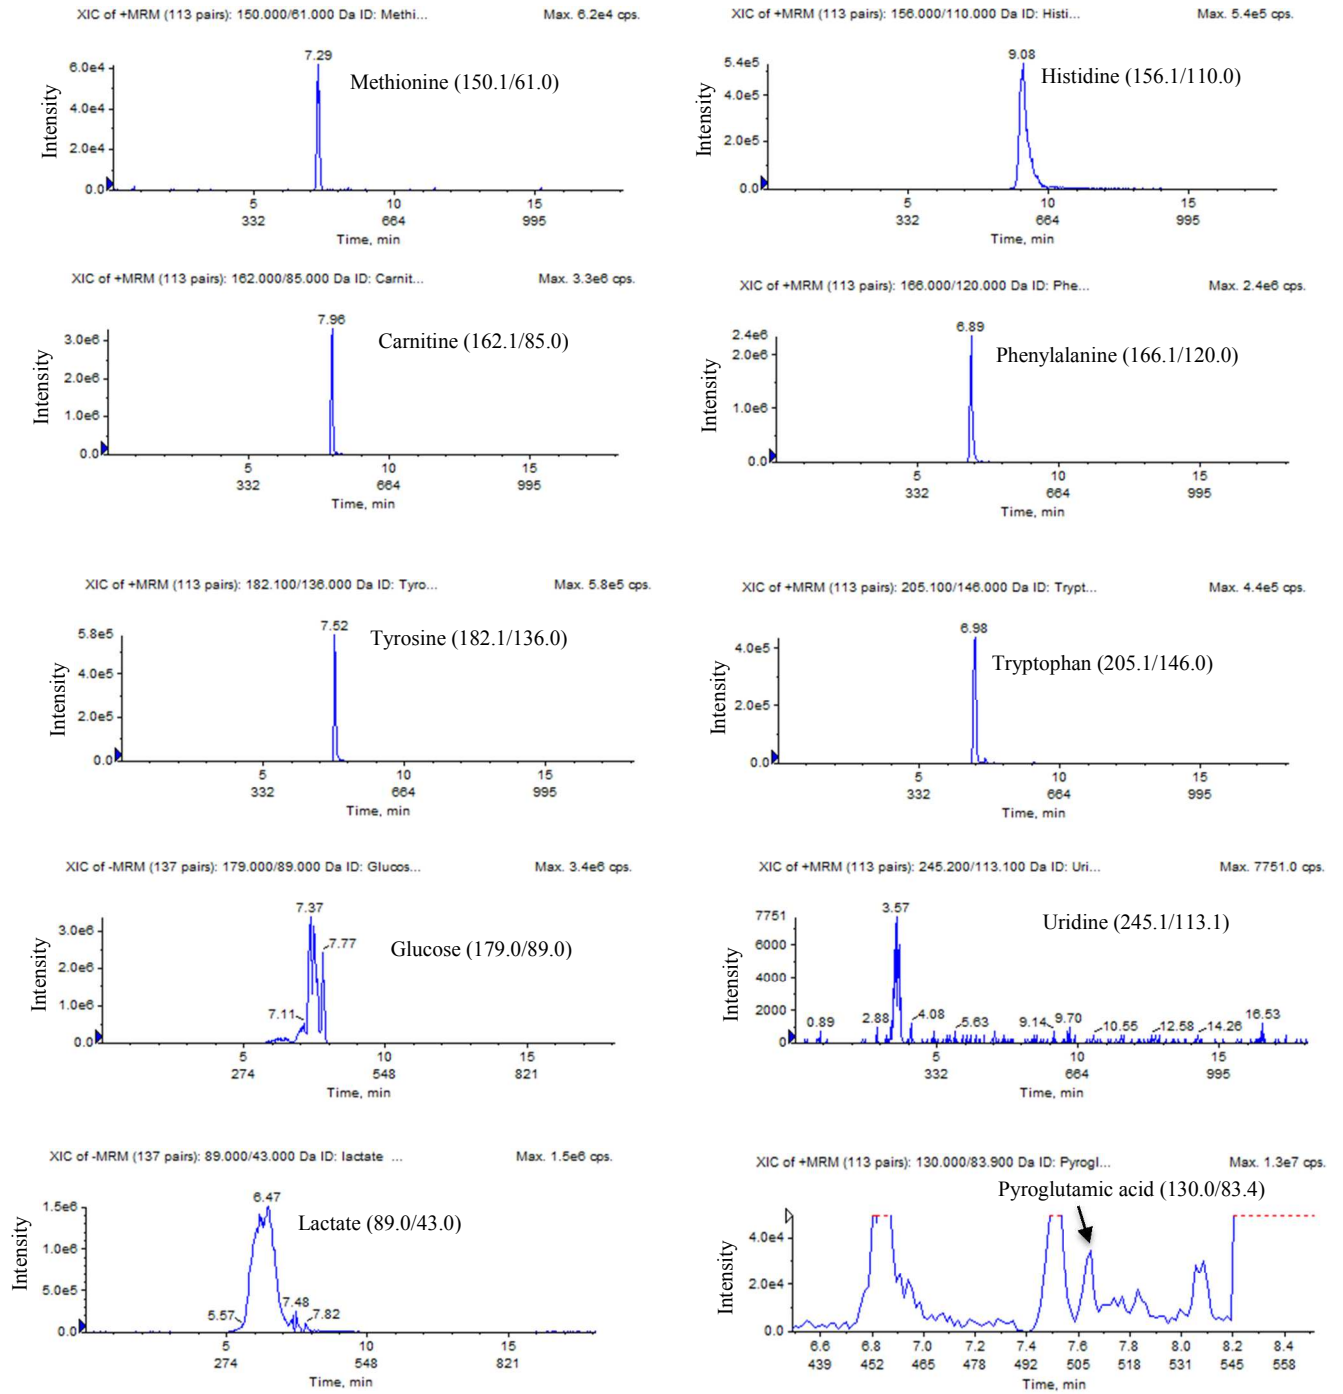

Figure S1: Continued.



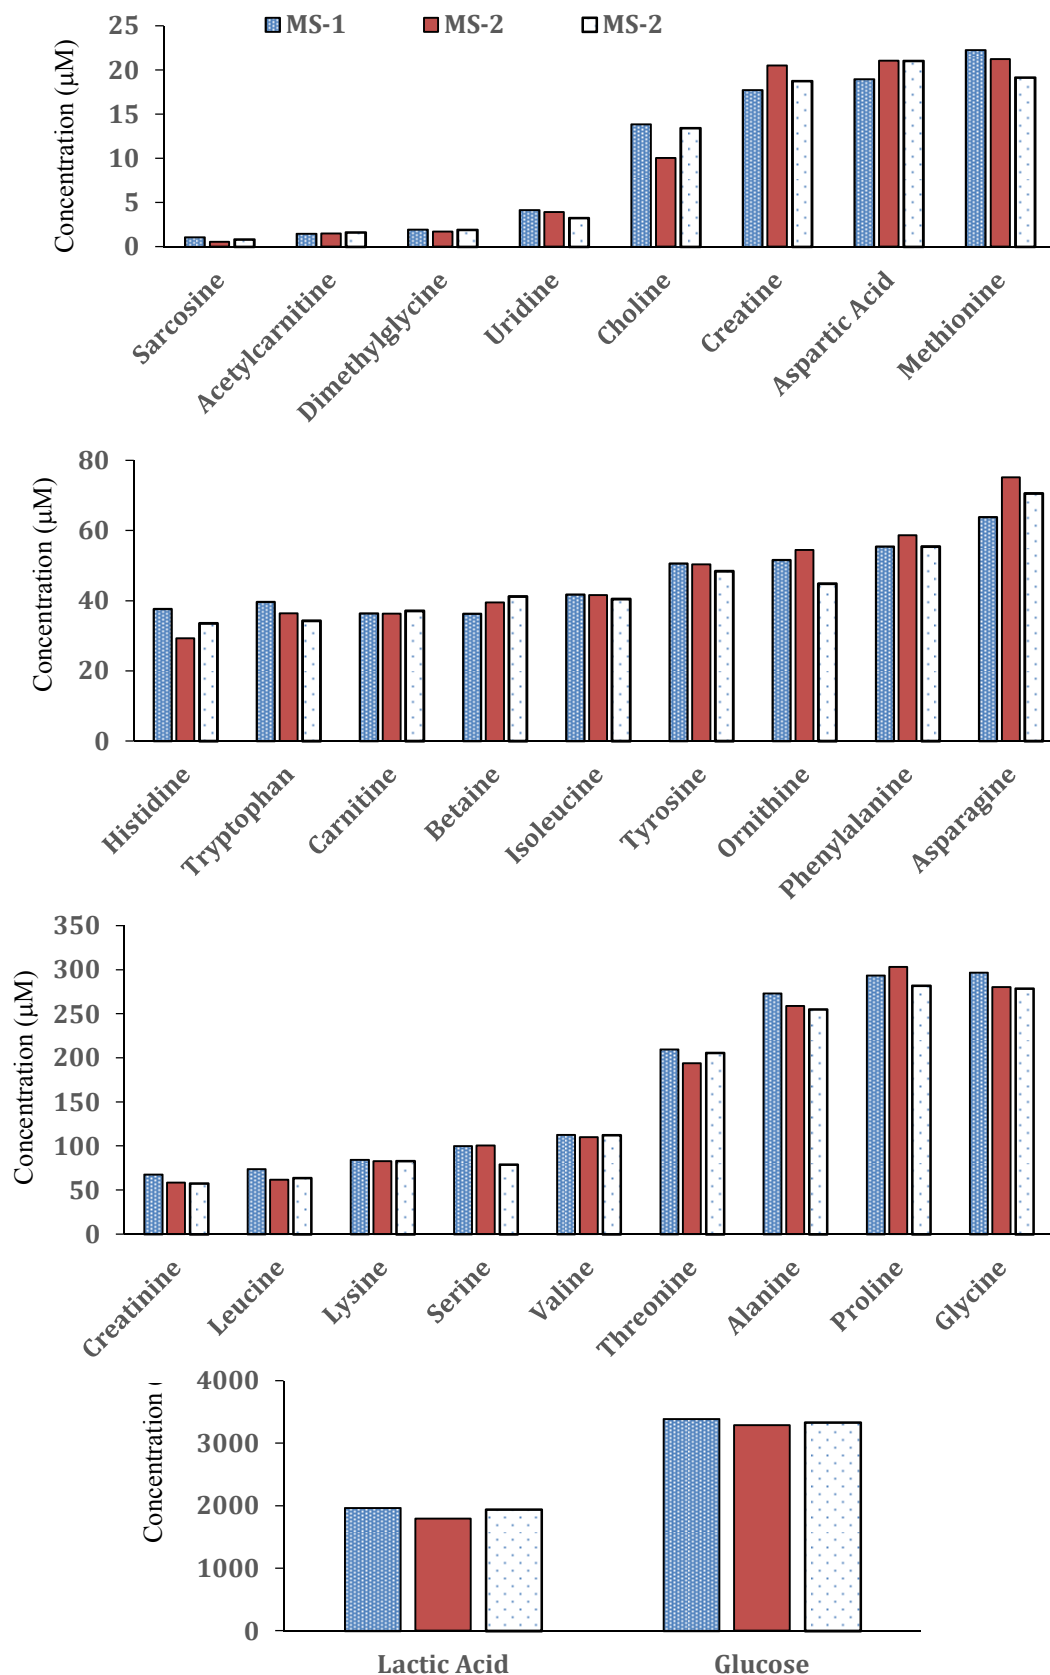

**Figure S2:** Comparison of absolute concentrations of 28 metabolites for the same serum as in Figure 2 obtained using NMR-guided MS, and using different types of serum samples as the reference. The MS data was obtained on an AB Sciex QTrap 6500+ MS. MS-1: one of the 8 serum samples was used as the reference; MS-2: a pooled sample from 8 serum samples was used as the reference; and MS-3: a commercial pooled human serum was used as the reference. All three references provided similar metabolite concentrations with an average CV of 6.3 %. Further, the results were similar for all eight serum samples. Glutamine and pyroglutamic acid were omitted due to their errors arising from glutamine

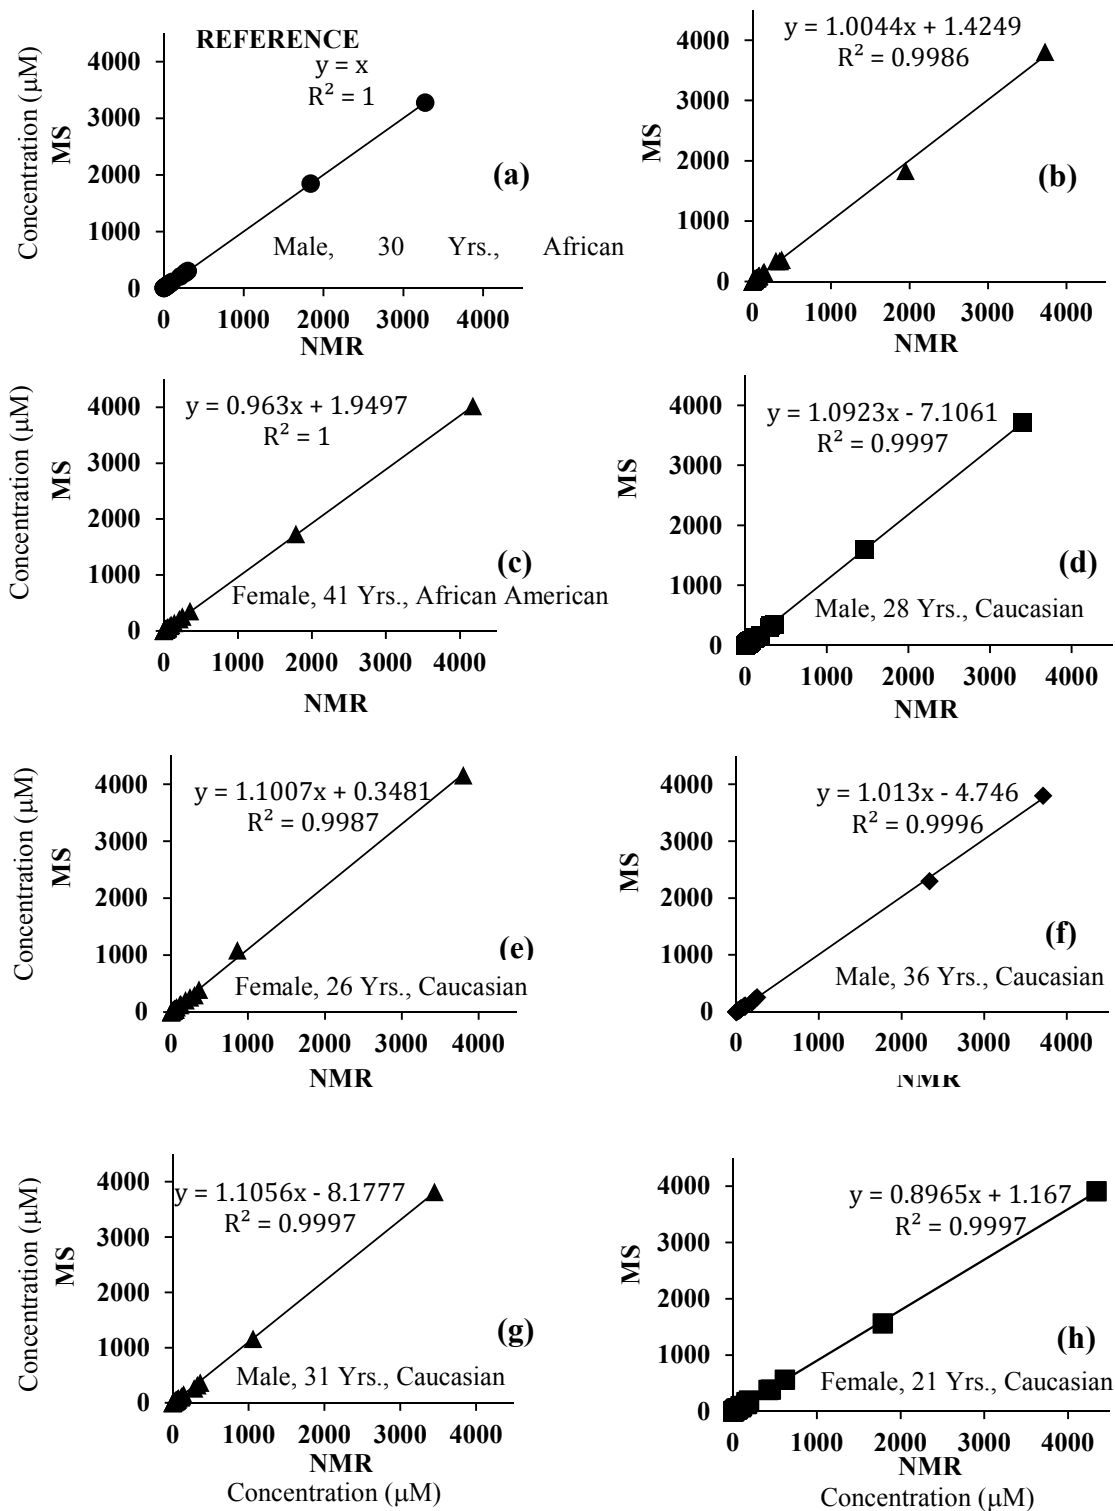

**Figure S3:** Correlation of concentrations all 30 metabolites including lactate and glucose for metabolites derived from NMR and NMR-guided MS for 8 healthy human serum samples. Here, MS concentrations for one serum sample were set equal to those derived from NMR for the same serum sample (Reference # 5; Fig. 3a;  $R^2=1$ ); these concentrations, along with their MRM peak areas were used as references for quantitation of the same metabolites in the remaining serum samples (Figs. 3b-3h). Virtually, identical results were obtained irrespective of the serum sample that was used as the reference.

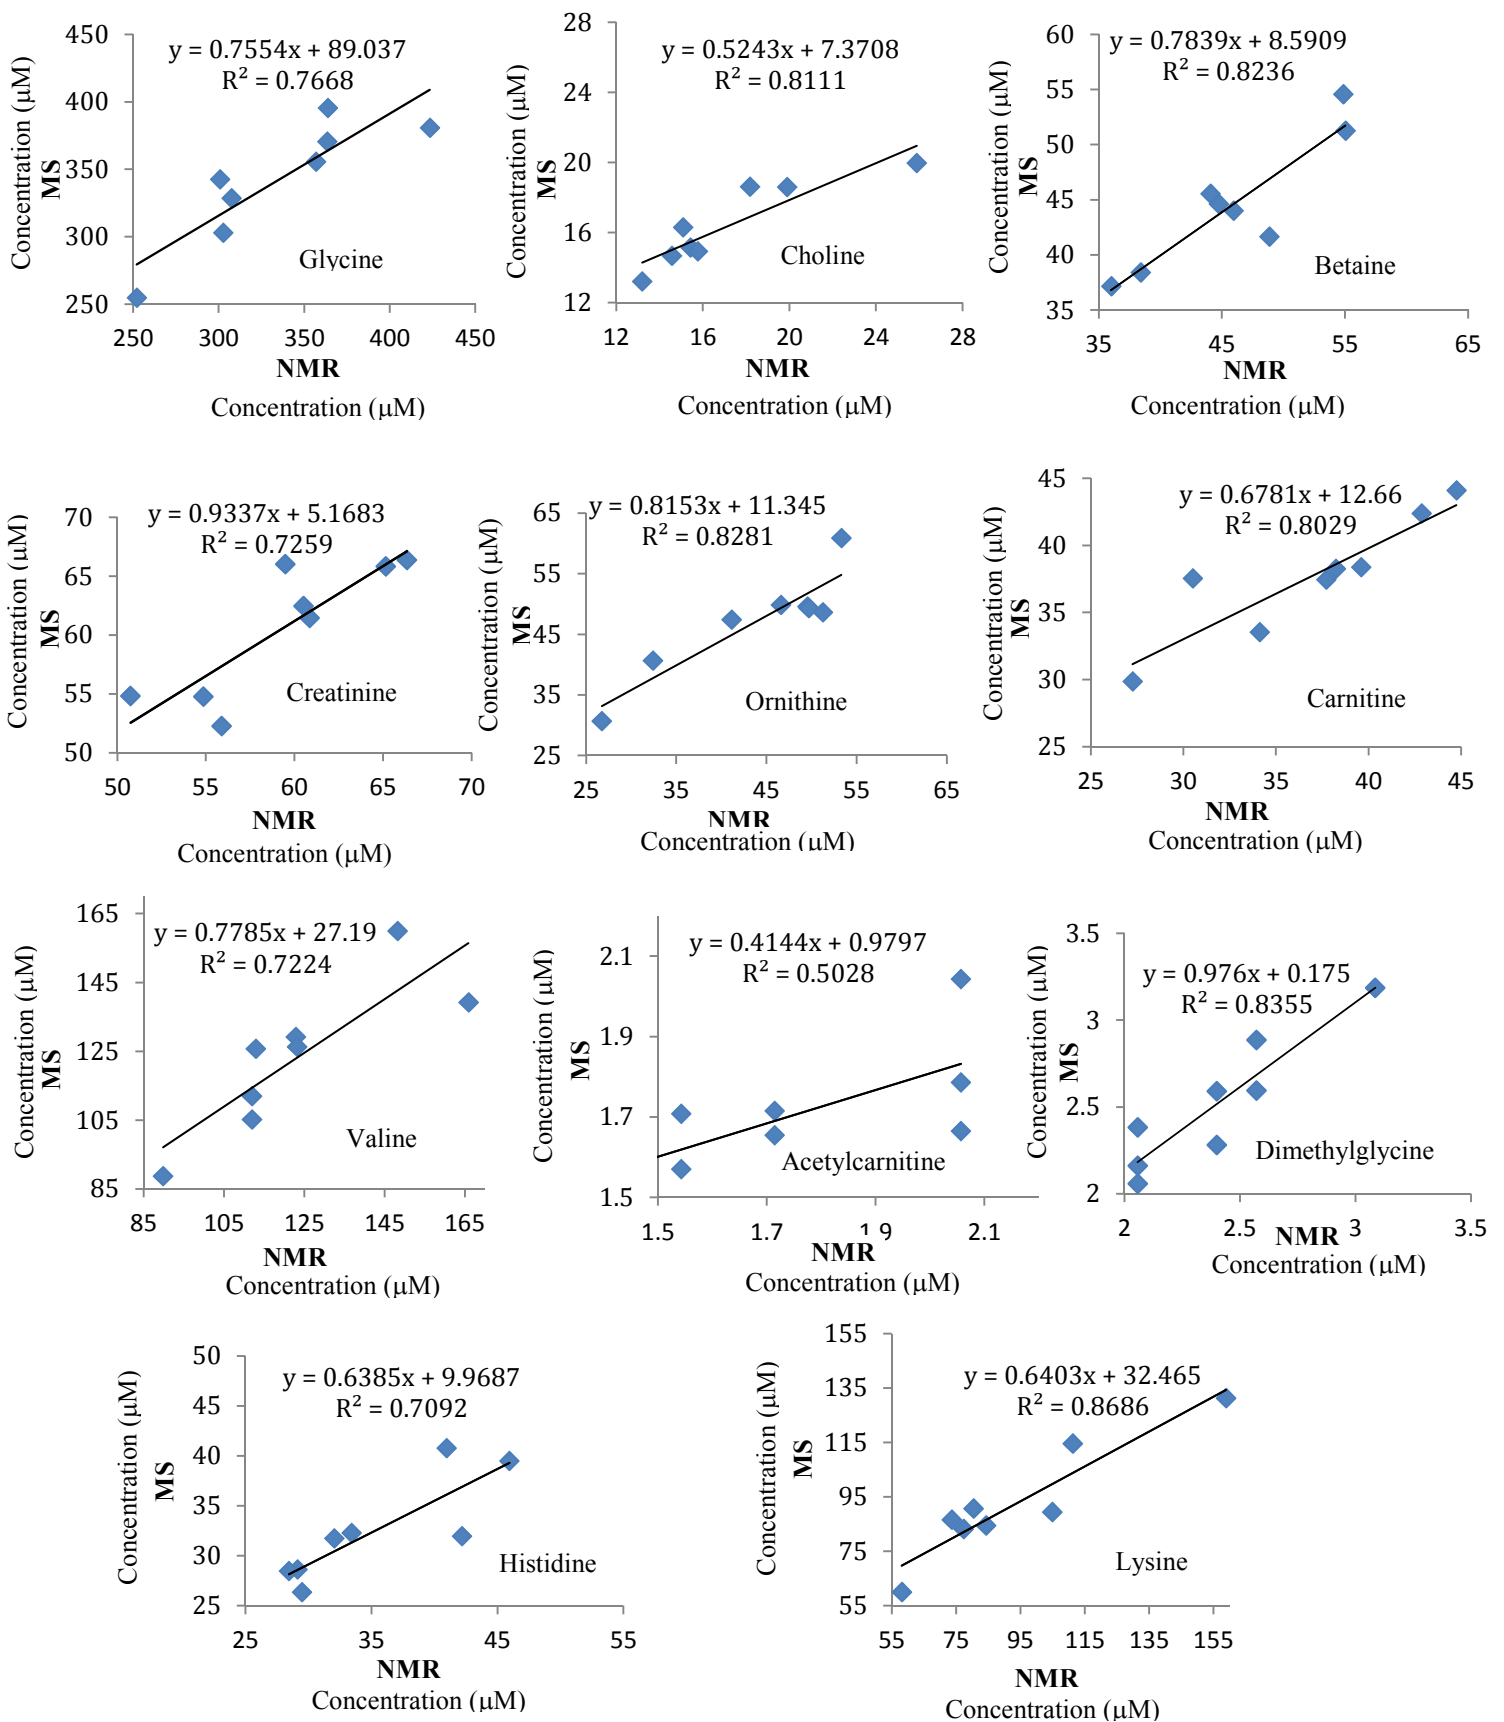

**Figure S4:** Correlation of absolute concentrations for metabolites derived from NMR and NMR-guided MS for 8 healthy human (4 male; 4 female) serum samples. Here, MS concentrations for one serum sample were set equal to those derived from NMR and used as the references for quantitation of the same metabolites in the remaining serum samples. Virtually identical results were obtained irrespective of the serum sample used as the reference.

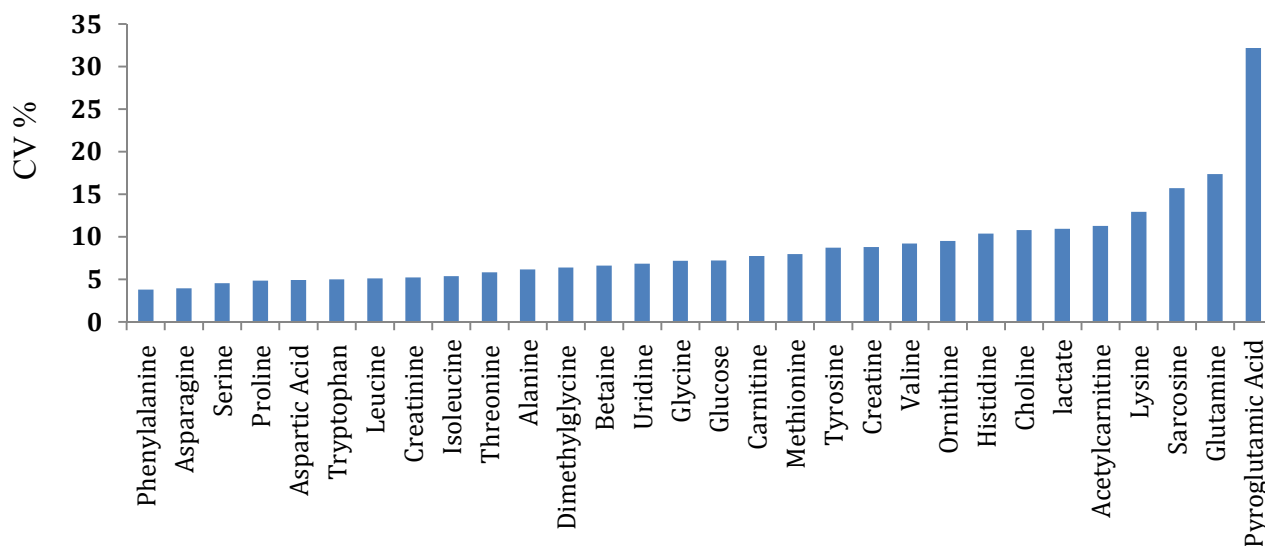

**Figure S5:** Coefficient of variation of concentrations of metabolites from the same sample obtained, separately, using different samples as NMR reference. Average CV for all except three metabolites was 7.2%, while that for more than 50% of the metabolites was 5.6%. The CVs for glutamine, pyroglutamic acid and sarcosine was more than 15% and are in accordance with their poor correlations between NMR and NMR guided MS concentrations (Figure 6).
